# Supplementary material for: Cognitive profiles in persons with depressive disorder and Alzheimer’s disease
Source: PubMed Central journal article supplement — Brain Commun. 2020 Nov 27;2(2):fcaa206. doi: 10.1093/braincomms/fcaa206 (PMC7772098; doi:10.1093/braincomms/fcaa206), 2020-11-27
Supplement: fcaa206_supplementary_data.pdf [file fcaa206_supplementary_data.pdf]

**SUPPLEMENTARY MATERIAL**

**Supplementary Table 1:** CSF values in AD and DD

| CSF Biomarkers      | AD (n= 63)                   | DD (n = 63)                 | P            | R <sup>2</sup> |
|---------------------|------------------------------|-----------------------------|--------------|----------------|
|                     | median / IQR                 | median / IQR                |              |                |
| Abeta1-42           | 485.8 /<br>328.0 – 545.0     | 867.0 /<br>703.8 – 1214.0   | <b>0.000</b> | 0.50           |
| Abeta1-40           | 8164.5 /<br>5805.0 – 10150.0 | 7073.5 / 6367.5 –<br>9496.0 | 0.905        | <0.01          |
| Total tau           | 577.0 /<br>404.0 – 663.5     | 232.0 /<br>197.5 – 266.0    | <b>0.000</b> | 0.57           |
| Phospho-tau         | 83.0 /<br>67.0 – 101.3       | 44.5 /<br>35.5 – 55.8       | <b>0.000</b> | 0.41           |
| Abeta1-42/Abeta1,40 | 0.060 /<br>0.050 – 0.078     | 0.130 /<br>0.110 – 0.148    | <b>0.000</b> | 0.57           |

**Legend:** AD: Alzheimers disease; DD: Depressive disorder

**Supplementary Table 2:** CSF values in nAD and dAD

| CSF Biomarkers      | nAD (n= 98)                  | dAD (n = 81)                 | P            | R <sup>2</sup> |
|---------------------|------------------------------|------------------------------|--------------|----------------|
|                     | median / IQR                 | median / IQR                 |              |                |
| Abeta1-42           | 416.0 /<br>342.8 – 545.0     | 455.0 /<br>327.5 – 545.5     | 0.522        | <0.01          |
| Abeta1,40           | 8615.0 /<br>7220.0 – 10625.0 | 8187.5 / 6025.0 –<br>10665.0 | 0.222        | 0.01           |
| Total tau           | 570.5 /<br>424.3 – 646.0     | 561.0 / 404.0 – 685.0        | 0.961        | <0.01          |
| Phospho-tau         | 84.0 /<br>72.0 – 100.5       | 74.0 / 60.0 – 92.0           | 0.054        | 0.03           |
| Abeta1-42/Abeta1,40 | 0.05 /<br>0.04 – 0.06        | 0.06 / 0.05 – 0.08           | <b>0.030</b> | 0.03           |

**Legend:** dAD: Alzheimer patients with depressive syndrome; nAD: Alzheimer patients without depressive syndrome
